# Supplementary material for: Microinterfaces in biopolymer-based bicontinuous hydrogels guide rapid 3D cell migration
Source: PubMed Central journal article supplement (PMC10980809; doi:10.1038/s41467-024-46774-y), 2024-03-29
Supplement: 41467_2024_46774_MOESM1_ESM.pdf [file 41467_2024_46774_MOESM1_ESM.pdf]

## Supplementary Information

### **Microinterfaces in biopolymer-based bicontinuous hydrogels guide rapid 3D cell migration**

Karen L. Xu<sup>1,2,3,4</sup>, Nikolas Di Caprio<sup>1,2</sup>, Hooman Fallahi<sup>5</sup>, Mohammad Dehghany<sup>2,6</sup>, Matthew D. Davidson<sup>2,7,8</sup>, Lorie Laforest<sup>3,4</sup>, Brian C. H. Cheung<sup>9</sup>, Yuqi Zhang<sup>1,3,4</sup>, Mingming Wu<sup>9</sup>, Vivek Shenoy<sup>2,6</sup>, Lin Han<sup>5</sup>, Robert L. Mauck<sup>1,2,3,4</sup>, Jason A. Burdick<sup>1,2,7,8</sup>

<sup>1</sup>Department of Bioengineering, University of Pennsylvania, Philadelphia, PA, 19104, USA

<sup>2</sup>Center for Engineering Mechanobiology, University of Pennsylvania, Philadelphia, PA, 19104, USA

<sup>3</sup>McKay Orthopaedic Research Laboratory, Department of Orthopaedic Surgery, Perelman School of Medicine, University of Pennsylvania, Philadelphia, PA, 19104, USA

<sup>4</sup>Translational Musculoskeletal Research Center, Corporal Michael J. Crescenz VA Medical Center, Philadelphia, PA, 19104, USA

<sup>5</sup>School of Biomedical Engineering, Science and Health Systems, Drexel University, Philadelphia, 19104, PA, USA

<sup>6</sup>Department of Materials Science and Engineering, University of Pennsylvania, Philadelphia, PA 19104, USA.

<sup>7</sup>BioFrontiers Institute, University of Colorado Boulder, Boulder, CO, 80303, USA

<sup>8</sup>Department of Chemical and Biological Engineering, University of Colorado Boulder, Boulder, CO, 80303, USA

<sup>9</sup>Department of Biological and Environmental Engineering, Cornell University, Ithaca, NY, 14850, USA

Corresponding Authors: [jason.burdick@colorado.edu](mailto:jason.burdick@colorado.edu) and [lemauck@penmedicine.upenn.edu](mailto:lemauck@penmedicine.upenn.edu)

## Supplementary Information

**a** Cyclodextrin-modified Hyaluronic Acid (CD-HA)    **b** Adamantane-modified Hyaluronic Acid (AD-HA)

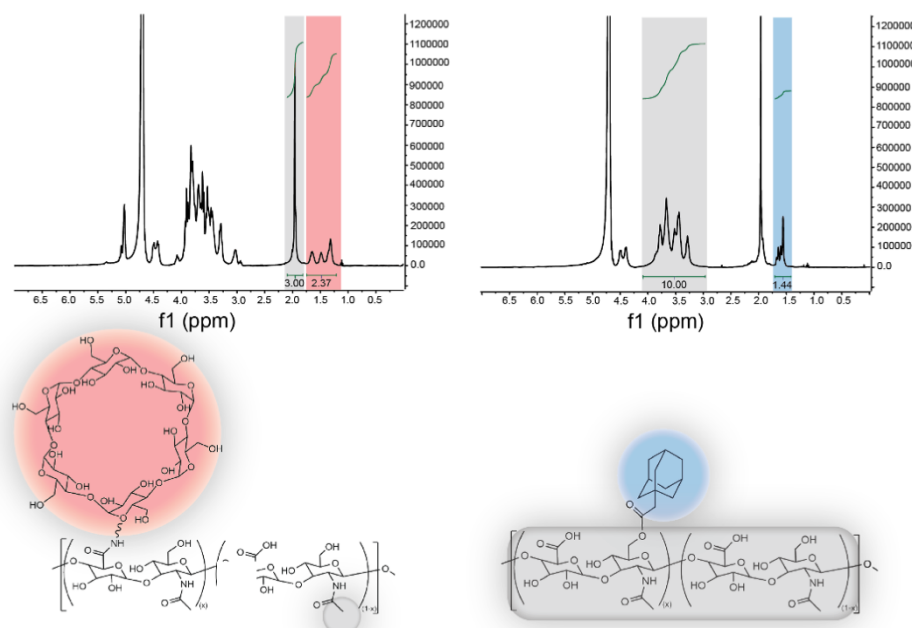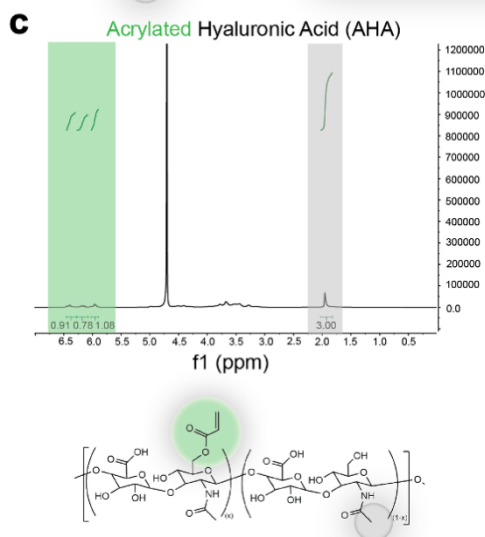

**Supplementary Fig. 1: <sup>1</sup>H NMR spectra of synthesized CD-HA, AD-HA, and AHA.** **a**, Chemical structure and <sup>1</sup>H-NMR spectrum of cyclodextrin-modified hyaluronic acid (CD-HA). Modification of CD was determined by the integration of the hexane linkers (Red, 12H,  $\delta$ : 1.2-1.75 ppm) when normalized to methyl group (Grey, 3H, 1.7-2.0 ppm). **b**, Chemical structure and <sup>1</sup>H-NMR spectrum of adamantane-modified hyaluronic acid (AD-HA). Modification of AD was determined by the integration of the ethyl multiplet (Blue, 12H,  $\delta$ : 1.4-1.7 ppm) when normalized to the HA backbone (Grey, 10H,  $\delta$ : 2.9-4.0 ppm). **c**, Chemical structure and <sup>1</sup>H-NMR spectrum of acrylated hyaluronic acid (AHA). Modification of AHA was determined by the integration of the acrylate peaks (Green, 3H,  $\delta$ : 5.9-6.1 ppm, 6.1-6.3 ppm, and 6.3-6.5 ppm) when normalized to the methyl group on HA (Grey, 3H,  $\delta$ : 1.7-2.0 ppm).

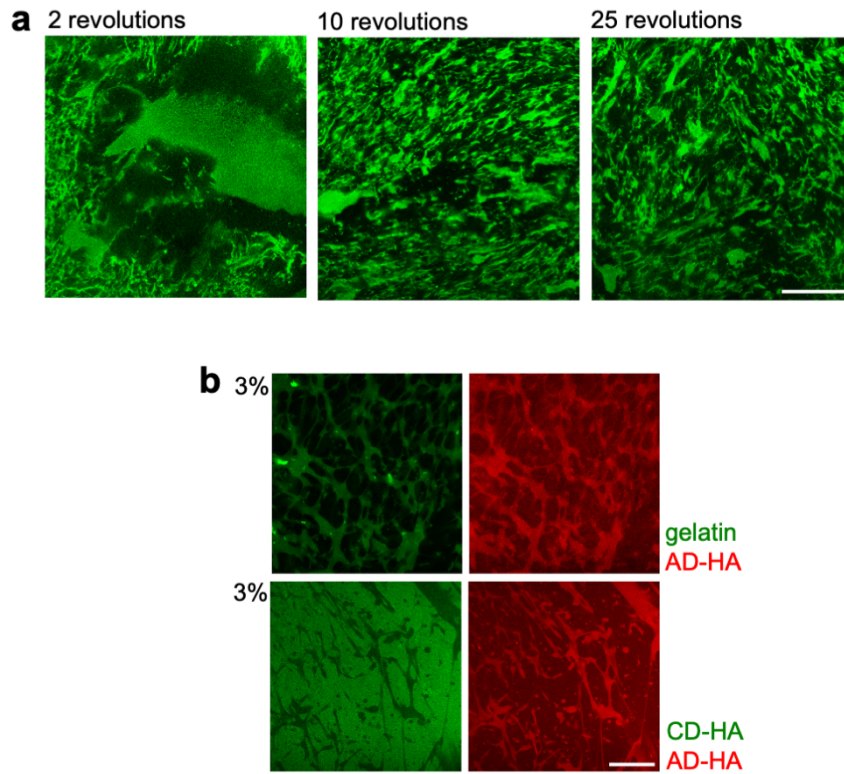

**Supplementary Fig. 2: Bicontinuous hydrogel structure relies on sufficient mixing of two immiscible polymer solutions.** **a**, Representative single Z-sections of bicontinuous hydrogels with variations in the extent of mixing (i.e., number of revolutions). Scale bar = 50  $\mu\text{m}$ . **b**, Representative single z-sections of a 3% bicontinuous hydrogel with selective fluorescent labeling of different hydrogel constituents, in which either gelatin (green) and AD-HA (red) are labeled (top) or CD-HA (green) and AD-HA (red) are labeled (bottom). Scale bar = 50  $\mu\text{m}$ .

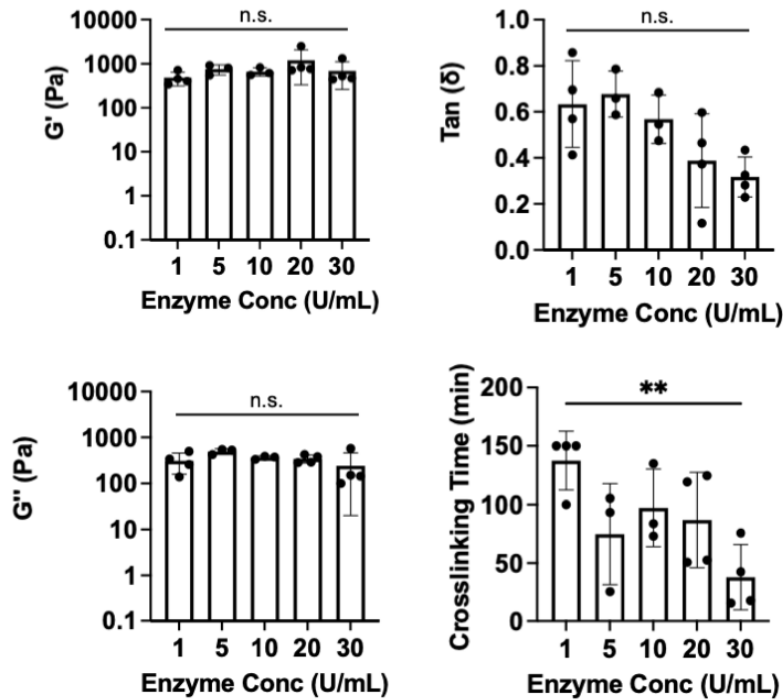

**Supplementary Fig. 3: Rheologic mechanical properties of bicontinuous hydrogels with varying enzyme concentrations.** Rheological measurements (1 Hz, 1% strain) of hydrogels (5wt% gelatin, 3wt% GH) with varying enzymatic crosslinker (1,5,10,20,30 U/mL) including storage modulus (top, left panel), loss modulus (bottom, left panel), tan (delta)(top, right panel), and time required for G' to reach 99% of its final modulus (bottom, right panel). n= 3 (5,10 U/mL) or 4 (1, 20, 30 U/mL) hydrogels per condition. Top Left, Top Right, Bottom Left panel: n.s. indicates no statistical significance. Bottom Right panel: 1 vs. 30  $**p=0.0087$ ; one-way ANOVA with Tukey post hoc. Data are mean  $\pm$  s.d. Source data provided as a source data file.

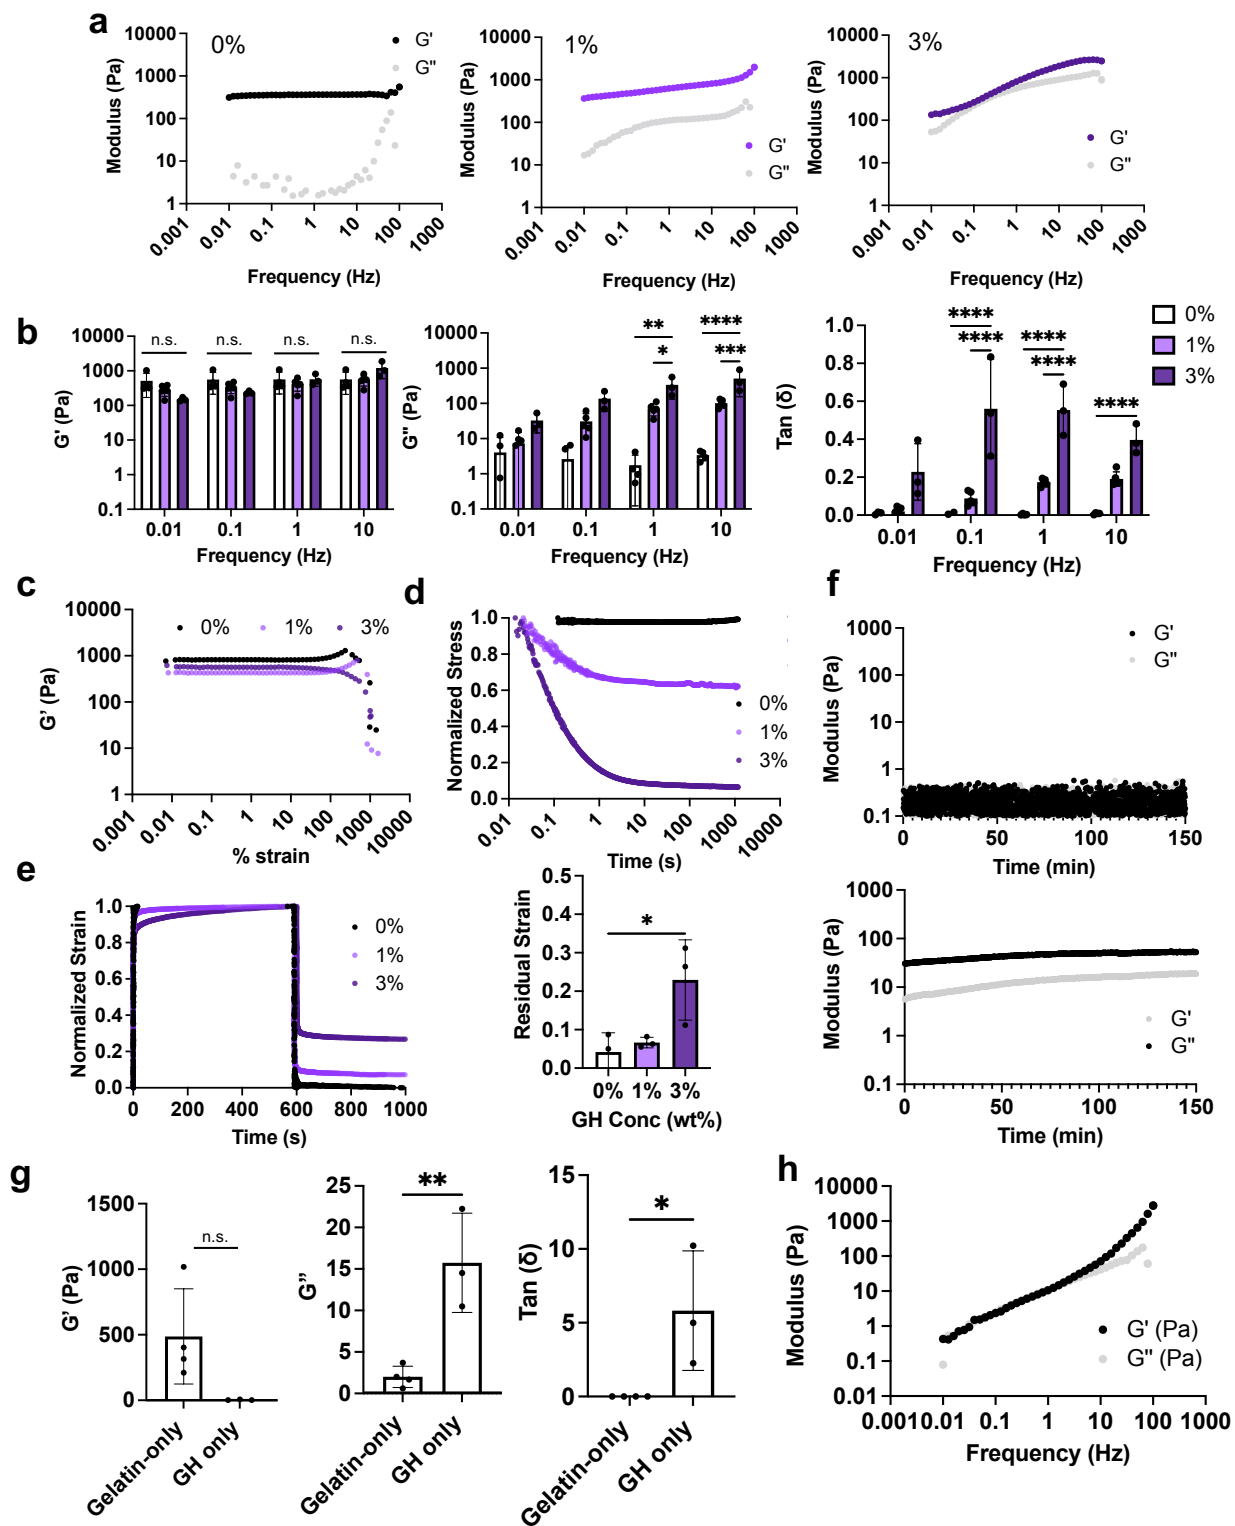

**Supplementary Fig. 4: Bicontinuous hydrogels are viscoplastic and stress-relaxing.** **a**, Representative frequency sweeps (0.01–100 Hz, 1% strain). **b**, Rheological measurements extrapolated from frequency sweeps across different frequencies (0.01, 0.1, 1, 10 Hz, 1% strain)

of storage modulus (left panel), loss modulus (middle panel), and tan ( $\delta$ ) (right panel).  $n = 3$  (3%), 4 (0%) or 5 (1%) hydrogels per condition. Left panel: n.s. indicates no statistical significance. Middle panel: 1 Hz: 0% vs. 3%  $**p = 0.043$ ; 1 Hz: 1% vs. 3%  $*p \leq 0.0335$ ; 10 Hz: 0% vs. 3%  $****p \leq 0.0001$ ; 10 Hz: 1% vs. 3%  $***p = 0.0001$ . Right panel: 0.1 Hz: 0% vs. 3%, 1% vs. 3%  $****p \leq 0.0001$ ; 1 Hz: 0% vs. 3%, 1% vs. 3%  $****p \leq 0.0001$ ; 10 Hz: 0% vs. 3%:  $****p \leq 0.0001$ ; two-way ANOVA with Tukey post hoc. **c**, Representative strain sweeps (1 Hz, 0.001 to 1000% strain). **d,e**, Representative stress relaxation (**d**, 10% strain) and creep-recovery (**e**-left panel, 100 Pa) studies and quantification of residual strain from creep-recovery studies (**e**-right panel).  $n = 3$  hydrogels per condition.  $*p = 0.0331$ , one-way ANOVA with Tukey post hoc. **f**, Representative gelation kinetics (1 Hz, 1% strain) of 5 wt% gelatin without enzymatic crosslinker or GH (top panel) and of 5wt% gelatin with GH but without enzymatic crosslinker (bottom panel). **g**, Quantification of  $G'$ ,  $G''$ , and tan ( $\delta$ ) for gelatin (data of 0% group from **Fig. 1e**) and GH hydrogel.  $n = 4$  hydrogels per condition. Left panel: n.s. indicates no statistical significance. Middle Panel:  $**p = 0.005$ ; Right panel:  $*p = 0.031$ ; two-tailed unpaired students t-test. **h**, Representative frequency sweep of 3 wt% GH hydrogel (0.01–100 Hz, 1% strain). Data are mean  $\pm$  s.d. Source data for (**a-h**) provided as a source data file.

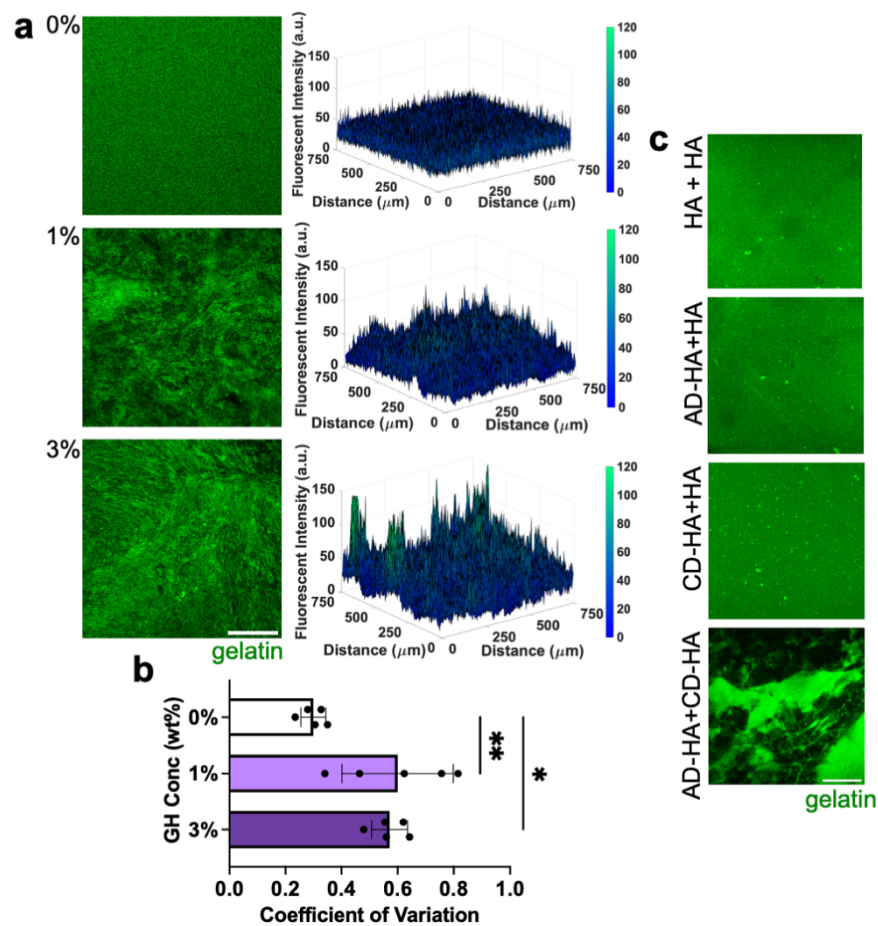

**Supplementary Fig. 5: Bicontinuous hydrogel structure evolves with increasing GH concentration and relies on both GH components.** **a**, Representative single Z-sections of bicontinuous hydrogels (left panel) separated into GR (green) and GP (unlabeled) domains and their corresponding fluorescent intensity profiles (right panel). Scale bar = 200  $\mu\text{m}$ . **b**, Quantification of variation in structural properties of GR domains (green).  $n = 5$  regions across 3 distinct gels per condition. 0% vs. 1%  $**p = 0.0059$ ; 0% vs. 3%  $*p = 0.0114$ ; one-way ANOVA with Tukey post hoc. **c**, Representative single Z sections of bicontinuous hydrogel structures based on presence of each GH component. Scale bar = 100  $\mu\text{m}$ . Data are mean  $\pm$  s.d. Source data for (b) provided as a source data file.

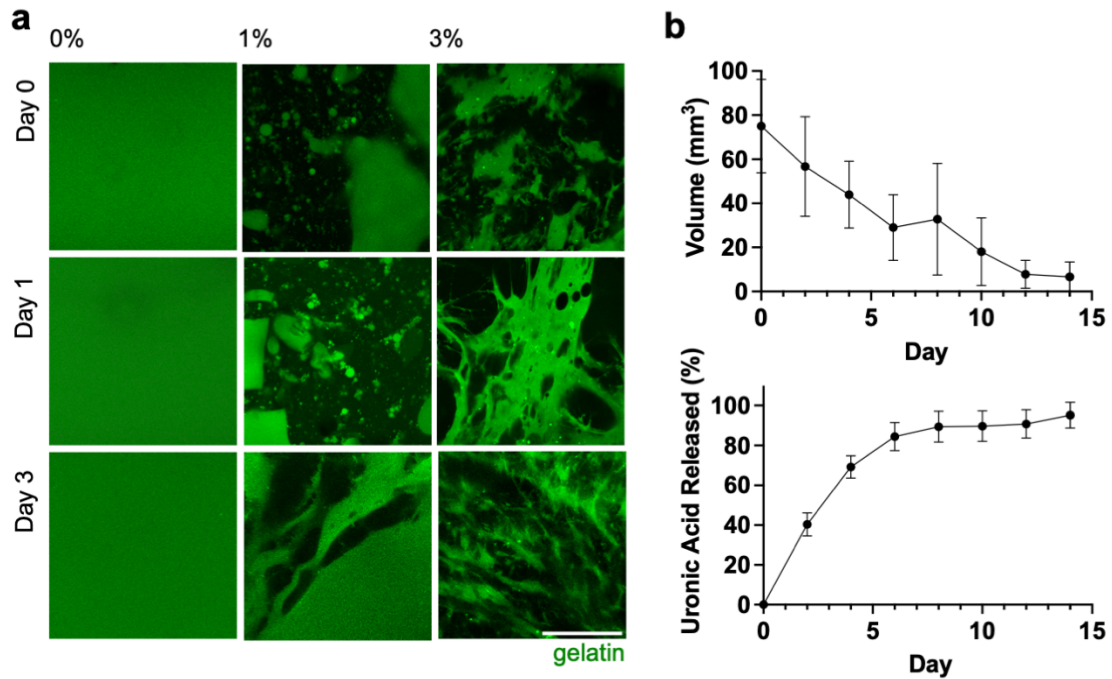

**Supplementary Fig. 6: Bicontinuous hydrogels remain structurally and chemically stable over several days.** **a**, Bicontinuous hydrogel structure where GR (green) and GP (unlabeled) remain distinct over 3 days. Scale bar = 100  $\mu$ m. **b**, Hydrogel volume (top panel) and cumulative uronic acid released (bottom panel) of a 3% bicontinuous hydrogel in PBS over time. Data are mean  $\pm$  s.d. Source data for **(b)** provided as a source data file.





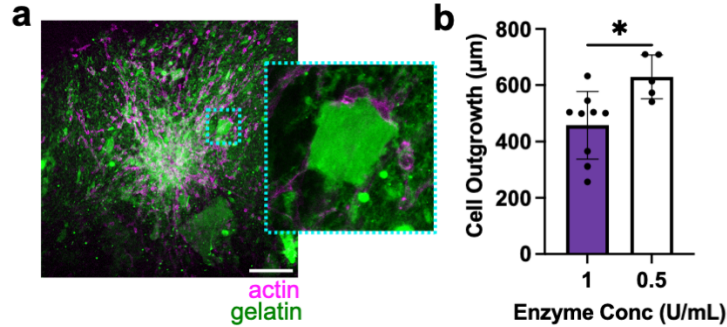

**Supplementary Fig. 8: Lowering enzymatic crosslinker does not affect interface-based guidance of cell migration.** **a**, Representative maximum projection of cells (actin:magenta) migrating from spheroid along interfaces between GR (green) and GP domains. Inset (dotted blue border) is a single Z-section highlighting cells along GR domain. Scale bar = 200  $\mu\text{m}$ . **b**, Quantification of cell outgrowth of 3% bicontinuous hydrogel with 1 U/mL (data from Fig. 3d) or 0.5 U/mL of transglutaminase.  $n = 5$  (0.5) or 9 (1) spheroids per condition from 2 biologically independent experiments.  $*p=0.0147$ , two-tailed unpaired student's t-test. Data are mean  $\pm$  s.d. Source data for (b) provided as a source data file.

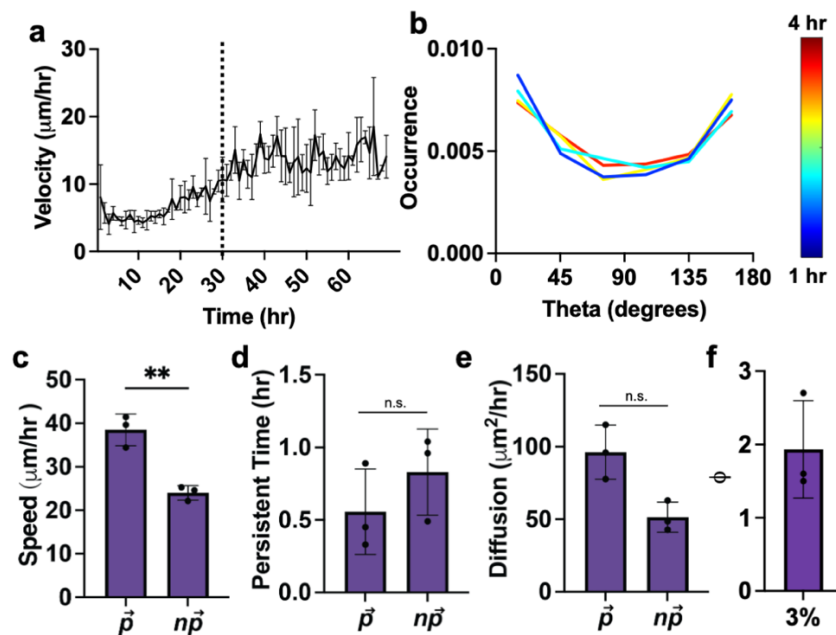

**Supplementary Fig. 9: Characterization of cell migration directionality in 3% bicontinuous hydrogel.** **a**, Population-averaged cell speed is time invariant once cells leave spheroid (Time  $\sim$ 30 hours, denoted with dashed line), a requirement for implementation of the APRW model. **b**, Representative distributions of angular displacements of cell outgrowth after specified time lag (denoted with heat map) of 3% GH hydrogel within one spheroid. **c-e**, Migration speed (**c**), persistence (**d**), and diffusion (**e**) along primary migration axis ( $\vec{p}$ ) and nonprimary migration axis ( $n\vec{p}$ ) of cells averaged per spheroid in 3% GH hydrogels.  $n = 3$  spheroids across 1 biologically independent experiment. **c**:  $**p=0.0014$ . **d,e**: n.s. indicates no statistical significance; two-tailed paired student's t-test. **f**, Anisotropic index  $\phi$  calculated from ratio of diffusion along  $\vec{p}$  and  $n\vec{p}$ .  $n = 3$  spheroids across 1 biologically independent experiment. n.s. indicates no statistical significance, two-tailed paired student's t-test. Data are mean  $\pm$  s.d. Source data for (a-f) provided as a source data file.

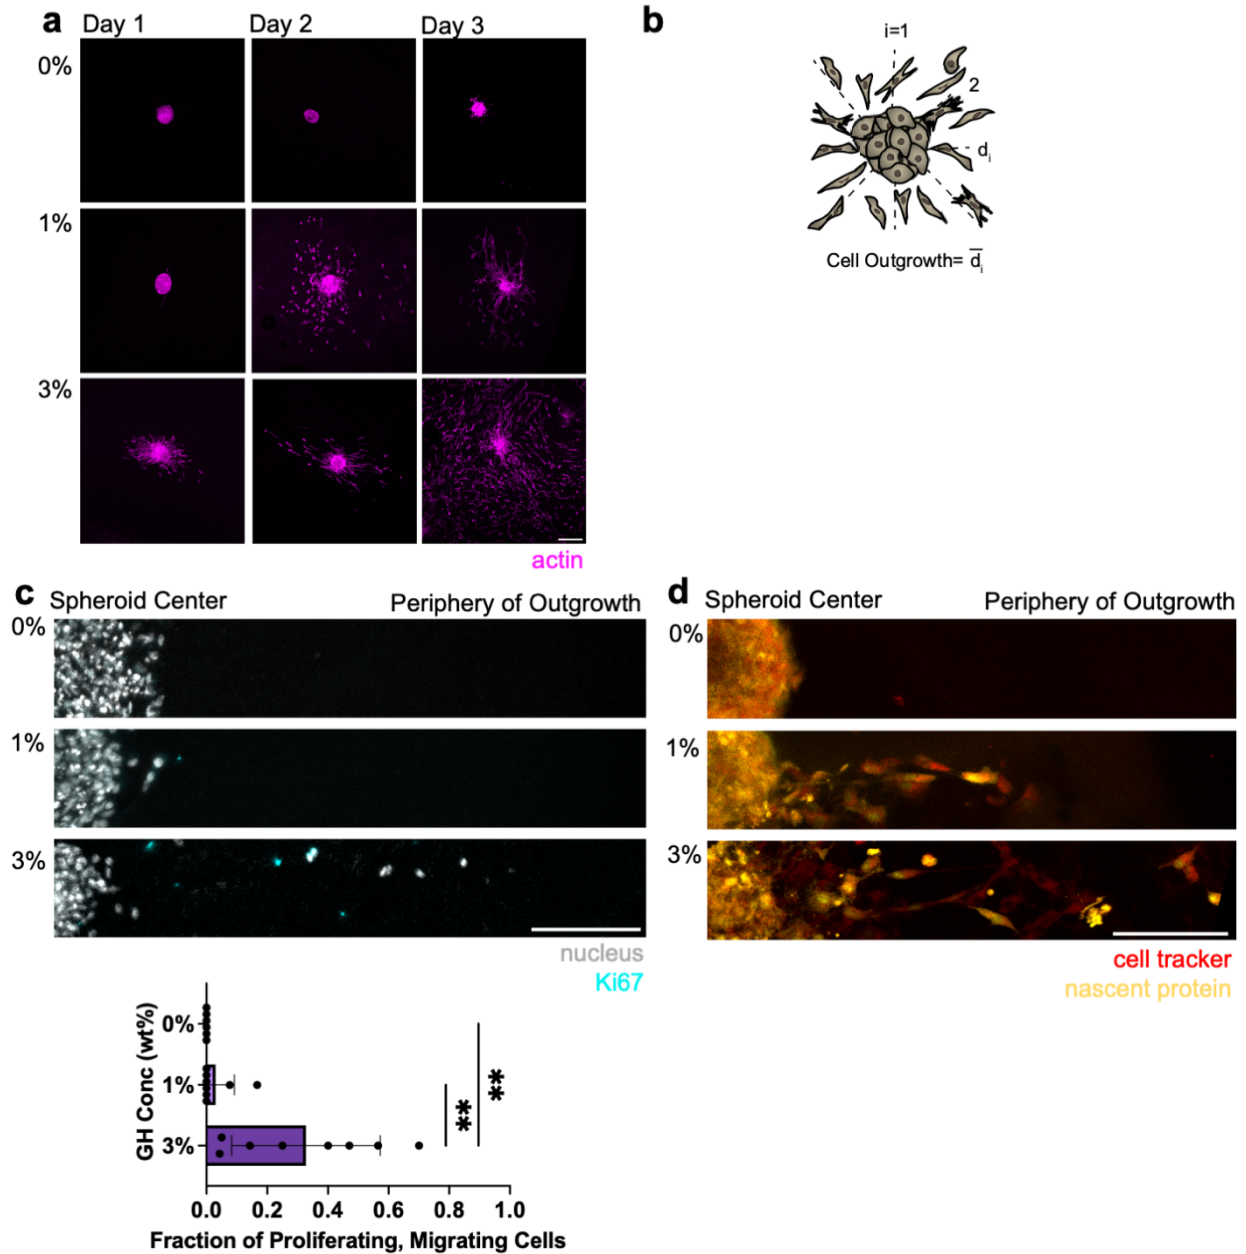

**Supplementary Fig. 10: MFC cell migration, proliferation and nascent protein deposition.** **a**, Representative images of cell outgrowth via actin (magenta) over time. Scale bar = 200  $\mu$ m. **b**, Schematic demonstrating quantification of spheroid outgrowth. **c**, Representative images of Ki67 stain (cyan) with nuclei mask (white) over 3 days (**c-top panel**, Scale bar = 100  $\mu$ m) and corresponding quantification (**c-bottom panel**).  $n = 6$  (0%) or  $8$  (1,3%) spheroids per condition from 2 biologically independent experiments. 0% vs. 3%  $**p=0.0023$ ; 1% vs. 3%  $**p=0.0027$ ; one-way ANOVA with Tukey post hoc. **d**, Representative images of nascent protein deposition (yellow) with cell tracker (red) over 3 days. Scale bar = 100  $\mu$ m. Data are mean  $\pm$  s.d. Source data for (c) provided as a source data file.

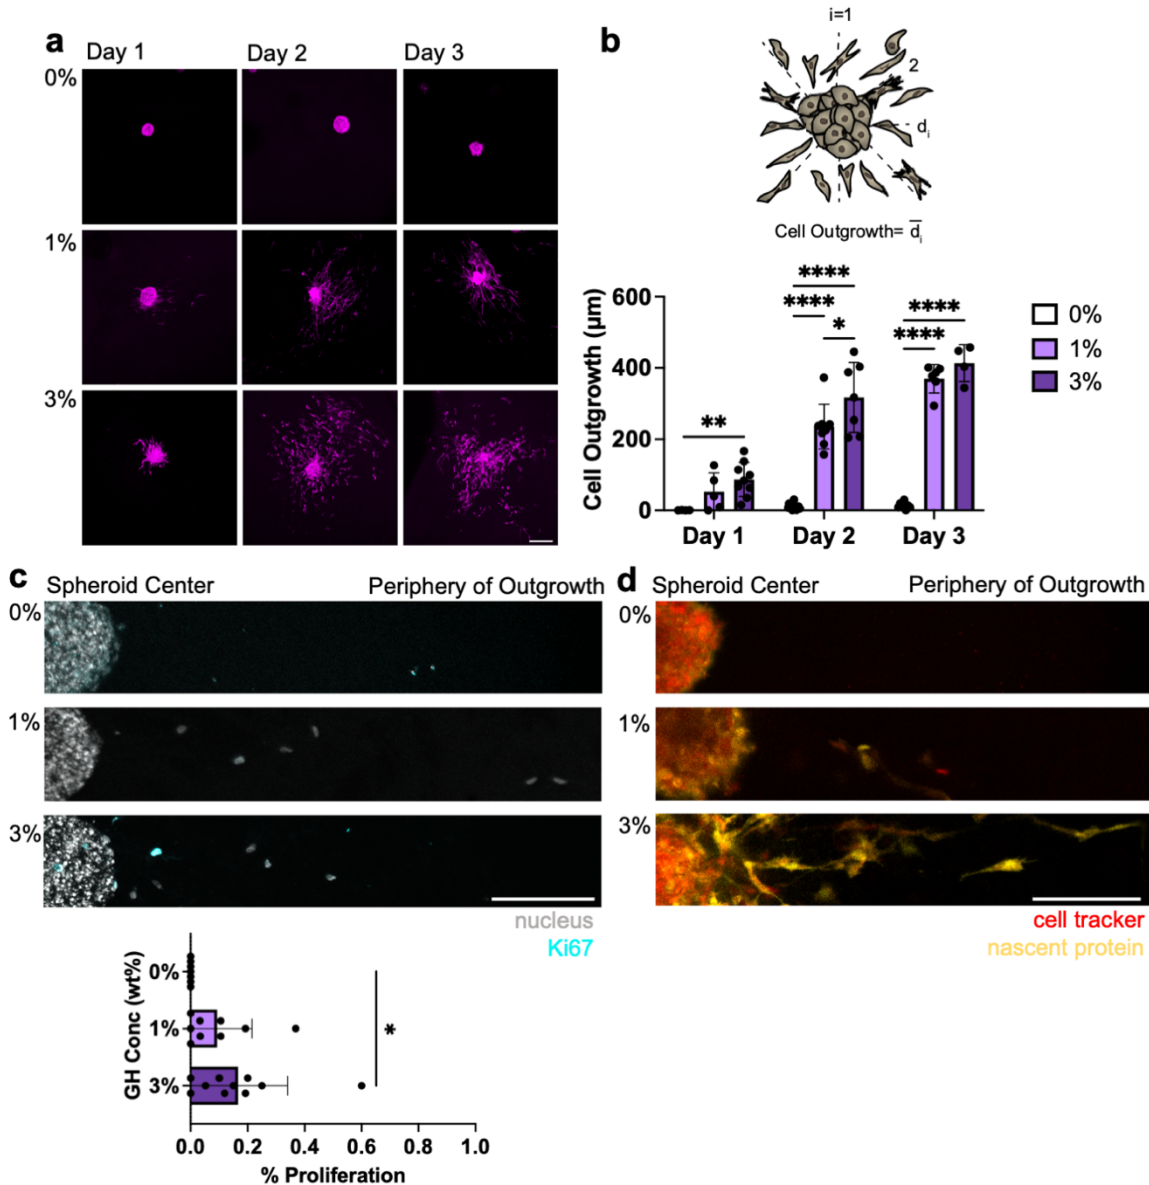

**Supplementary Fig. 11: MSC cell migration, proliferation and nascent protein deposition.**

**a**, Representative images of cell outgrowth via actin (magenta) over 3 days. Scale bar = 200  $\mu\text{m}$ . **b**, Schematic demonstrating quantification of spheroid outgrowth (top panel), and quantification of MSC cell outgrowth over time (bottom panel).  $n = 4$  (Day 3:3%), 5 (Day 1:1%), 6 (Day 3:1), 7 (Day 2:3%), 8 (Day 2:1%), 9 (Day 1:0%,3%), 12 (Day 3:0%), or 14 (Day 2:0%) spheroids per condition across 2 biologically independent experiments. Day 1: 0% vs. 3%  $**p=0.0037$ ; Day 2: 0% vs. 1%, 0% vs. 3%  $****p\leq 0.0001$ ; Day 2: 1% vs. 3%  $*p=0.0227$ ; Day 3: 0% vs. 1%, 0% vs. 3%  $****p\leq 0.0001$ ; two-way ANOVA with Tukey post hoc. **c**, Representative images of Ki67 stain (cyan) with nuclei mask (white) over 3 days (**c-top panel**, Scale bar = 100  $\mu\text{m}$ ) and corresponding quantification (**c-bottom panel**).  $n = 7-10$  spheroids per condition across 2 biologically independent experiments.  $*p=0.0418$ ; one-way ANOVA with Tukey post hoc. **d**, Representative images of nascent protein deposition (yellow) with cell tracker (red) over 3 days. Scale bar = 100  $\mu\text{m}$ . Data are mean  $\pm$  s.d. Source data for (b,c) provided as a source data file.

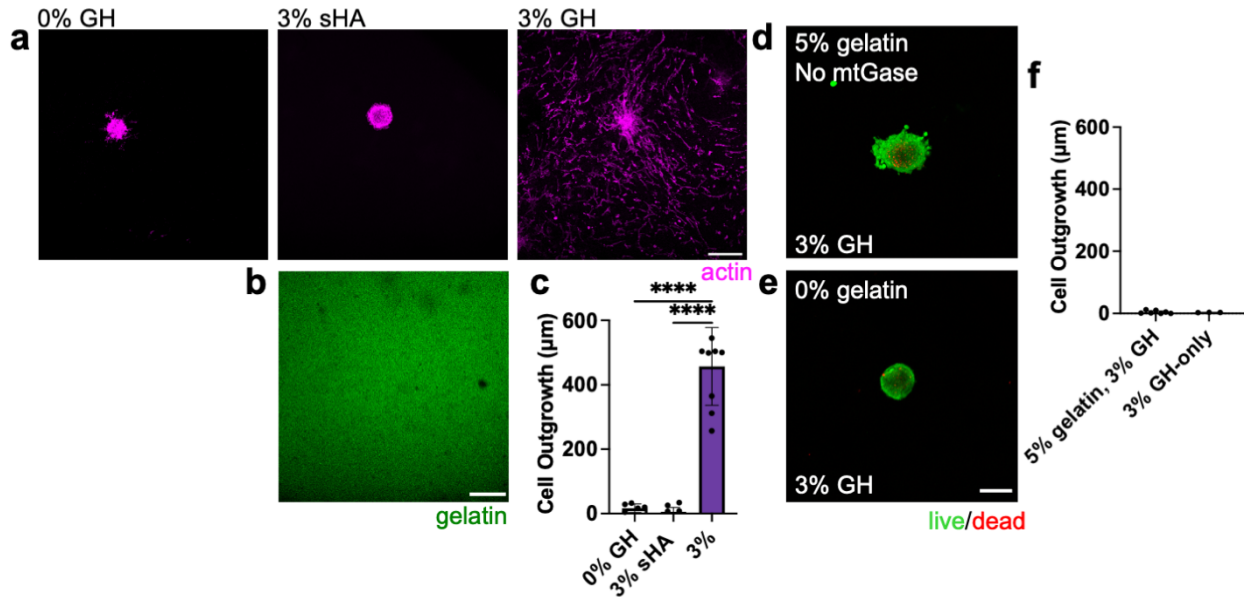

**Supplementary Fig. 12: The presence of HA alone does not account for increased migration.** **a**, Representative images of cell (actin: magenta) outgrowth at day 3 in 0 wt% GH, 3 wt% soluble HA (sHA), or 3% bicontinuous hydrogel (all conditions with 5 wt% gelatin and 1 U/mL transglutaminase, 3% from Fig. 3c). Scale Bar = 200 µm. **b**, Gelatin (green) distribution in hydrogels with soluble HA. Scale Bar = 200 µm. **c**, Quantification of cell outgrowth in sHA group compared to 3% bicontinuous hydrogel (data from Fig. 3d). n = 6 (0%), 9 (3%) or 10 (1%) spheroids per condition from 2 biologically independent experiments. \*\*\*\* $p \leq 0.0001$ , one-way ANOVA with Tukey post hoc. **d,e**, Live (green)-Dead (red) of MFC spheroids in 3 wt% GH and 5 wt% (**d**) or 0 wt% gelatin (**e**). Scale Bar = 200 µm. **f**, Quantification of cell outgrowth based on Live/Dead stain in 3% GH, and 5% gelatin, 3% GH-only hydrogels (all conditions without transglutaminase). Data are mean  $\pm$  s.d. Source data for (**c,f**) provided as a source data file.

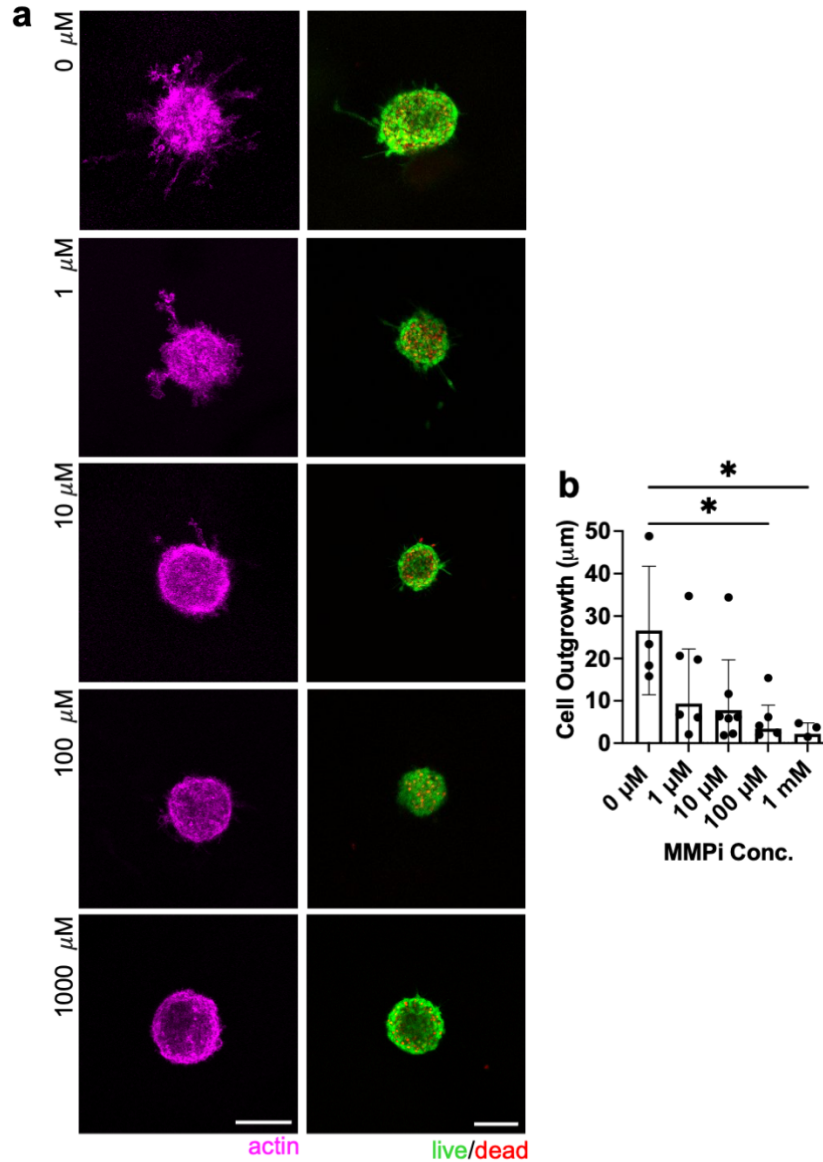

**Supplementary Fig. 13: Cell outgrowth via protease-dependent mechanisms can be tuned through MMP inhibitor concentration.** **a**, Representative images of actin (magenta) in 0% GH hydrogel after 3 days with varying Marimastat concentrations (left panels) and Live (green)-Dead (red) of MFC spheroids in corresponding inhibitor groups (right panels). Scale bar = 100  $\mu\text{m}$  **b**, Quantification of cell outgrowth into 0 wt% GH hydrogels.  $n = 4$  (0, 1 mM), 8 (10, 100  $\mu\text{M}$ ) or 9 (1  $\mu\text{M}$ ) spheroids per condition from 1 biologically independent experiment. 0 vs. 100  $\mu\text{M}$   $*p = 0.0123$ ; 0 vs. 1 mM  $*p = 0.0264$ ; one-way ANOVA with Tukey post hoc. Data are mean  $\pm$  s.d. Source data for (b) provided as a source data file.

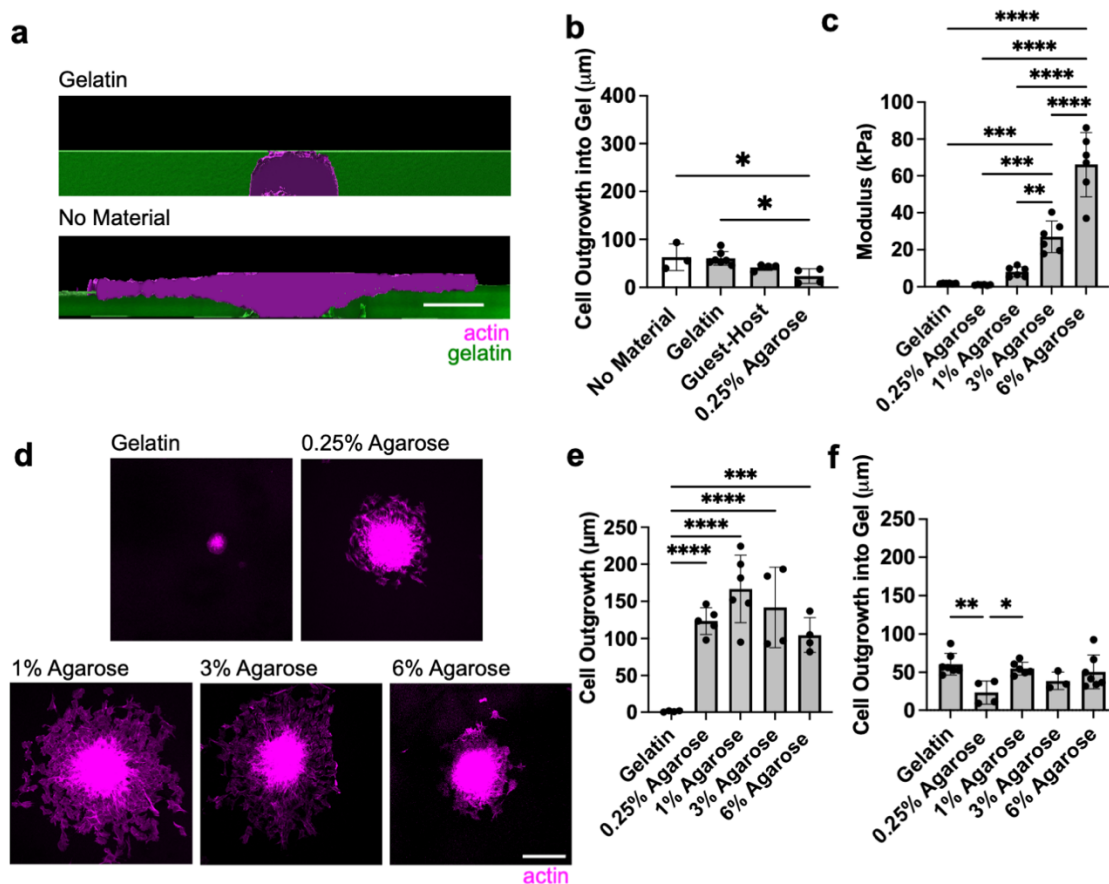

**Supplementary Fig. 14: Cells infiltrate along engineered agarose interfaces despite increasing differential mechanical properties across the interface.** **a**, Side view of 3D reconstructions of spheroids (magenta) spreading on gelatin surface (green) after 1 day. Scale bar = 80  $\mu\text{m}$ . **b**, Perpendicular outgrowth from spheroids corresponding to Fig. 5a-d.  $n = 3$  (No Material, 4 (GH, 0.25% Agarose), or 7 (Gelatin) from 2 biologically independent experiments. Note that quantification is from spheroid center, which is why there are variations depending on the material. No Material vs. 0.25% Agarose  $*p = 0.0266$ ; Gelatin vs. 0.25% Agarose  $*p = 0.0109$ ; one-way ANOVA with Tukey post hoc. **c**, Compression modulus of gelatin (5wt%, 1 U/mL enzymatic crosslinker), and varying wt% of agarose.  $n = 6$  hydrogels per condition. Gelatin vs. 3% Agarose  $***p \leq 0.0004$ ; 0.25% vs. 3% Agarose  $***p \leq 0.0002$ ; 1% vs. 3% Agarose  $**p = 0.0081$ ; Gelatin vs. 6% Agarose, 0.25% vs. 6% Agarose, 1% vs. 6% Agarose, 3% vs. 6% Agarose  $****p \leq 0.0001$ ; one-way ANOVA with Tukey post hoc. **d**, **e**, Representative top-down images of spheroids (magenta) migrating along interface created with gelatin and top layer after 1 day (**d**, Scale bar = 200  $\mu\text{m}$ ) and corresponding quantification (**e**).  $n = 4$  (3, 6% Agarose), 5 (0.25% Agarose), or 6 (1% Agarose, Gelatin) spheroids per condition across 2-3 biologically independent experiments. Gelatin vs. 0.25% Agarose, Gelatin vs. 1% Agarose, Gelatin vs. 3% Agarose  $****p \leq 0.0001$ ; Gelatin vs. 6% Agarose  $***p = 0.0008$ ; one-way ANOVA with Tukey post hoc. **f**, Perpendicular outgrowth from spheroids.  $n = 3$  (3% Agarose), 4 (0.25% Agarose), 6 (1% Agarose) or 7 (Gelatin, 6% Agarose) spheroids per condition across 2-3 biologically independent experiments. Gelatin vs. 0.25% Agarose  $**p = 0.0087$ ; 0.25% vs. 1% Agarose  $***p = 0.0389$ , one-way ANOVA with Tukey post hoc. Data are mean  $\pm$  s.d. Source data for (**b,c,e,f**) provided as a source data file.

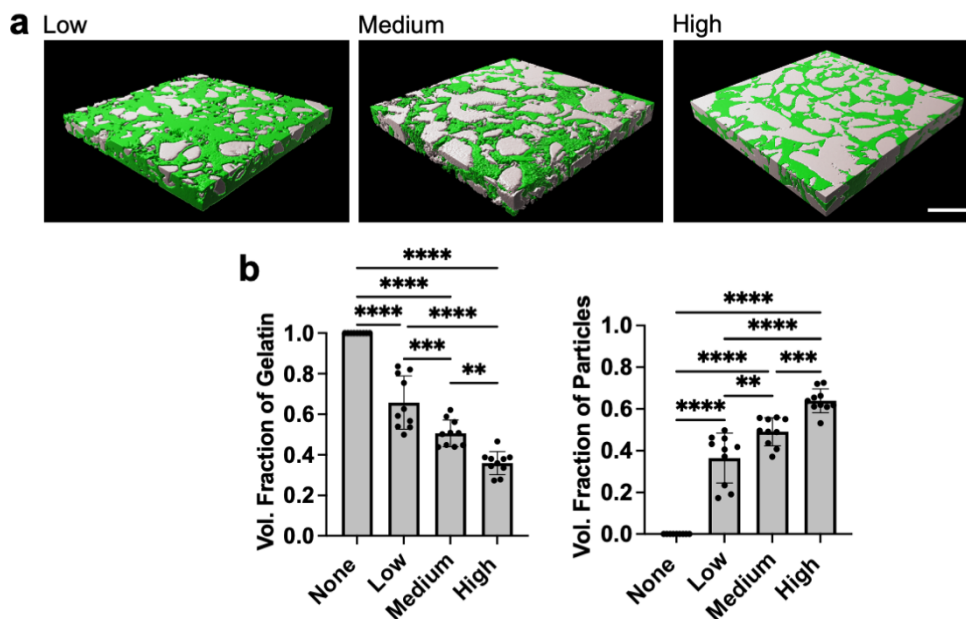

**Supplementary Fig. 15: Additional structural characterization of gelatin-agarose particle composite hydrogels.** **a**, Representative 3D reconstructions of hydrogels with varying densification (Low, Medium, High) of agarose particles within gelatin continuous phase (gelatin: green; agarose particles: gray). Scale bar = 100  $\mu\text{m}$ . **b**, Fraction of total volume occupied by gelatin (left panel) and agarose particles (right panel) within hydrogels.  $n = 9$  (None) or 10 (Low, Medium, High) regions across 3 hydrogels per condition. Right panel: None vs. Low, None vs. Medium, None vs. High, Low vs. High \*\*\*\* $p \leq 0.0001$ ; Low vs. Medium \*\*\* $p = 0.0009$ . Left Panel: None vs. Low, None vs. Medium, None vs. High, Low vs. High \*\*\*\* $p \leq 0.0001$ ; Low vs. Medium \*\* $p = 0.0035$ ; Medium vs. High \*\*\* $p = 0.0005$ ; one-way ANOVA with Tukey post hoc. Data are mean  $\pm$  s.d. Source data for (b) provided as a source data file.



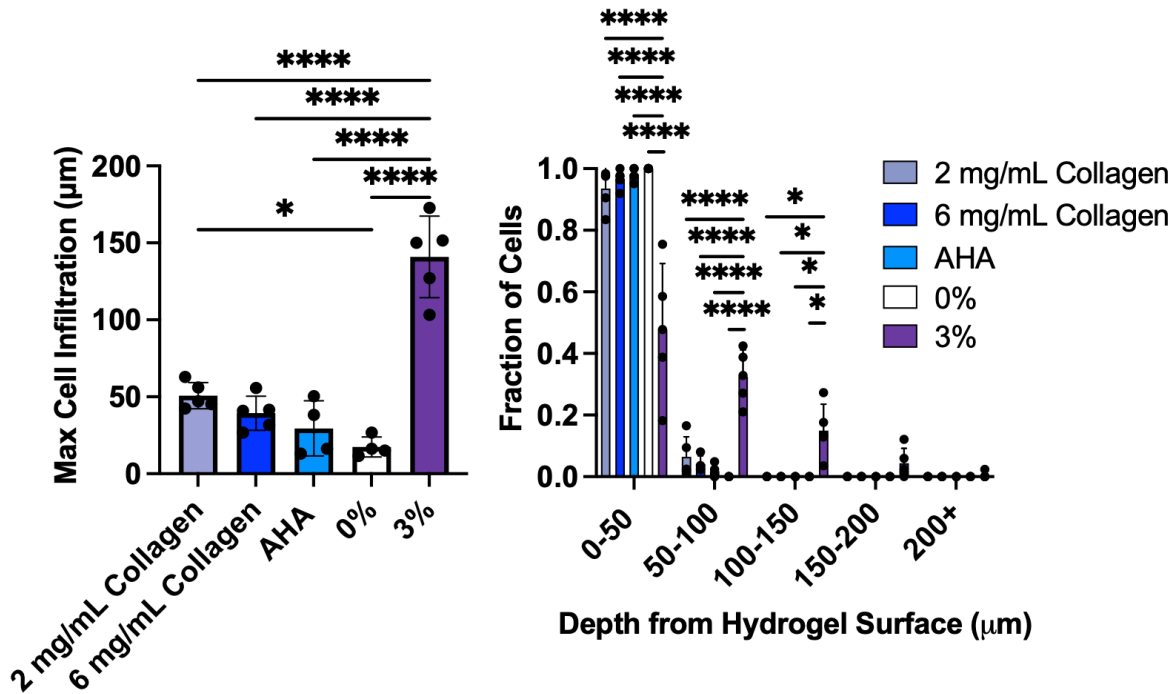

**Supplementary Fig. 16: Cell infiltration from explants into uniform hydrogels. a,** Quantification (0%, 3% groups from Fig. 6c) of maximum infiltration (left) and extent of cell infiltration through hydrogel depth (right).  $n = 4$  (AHA, 0%) or  $5$  (2 mg/mL, 6 mg/mL, 3%) explants per condition from one biologically independent experiment. Left panel: 2 mg/mL collagen vs. 0%  $*p = 0.045$ ; 2 mg/mL Collagen vs. 3%, 6 mg/mL Collagen vs. 3%, AHA vs. 3%, 1% vs. 3%  $****p \leq 0.0001$ ; one-way ANOVA with Tukey post hoc. Right panel: 0-50: 2 mg/mL Collagen vs. 3%, 6 mg/mL Collagen vs. 3%, AHA vs. 3%, 0% vs. 3%  $****p \leq 0.0001$ ; 50-100: 2 mg/mL Collagen vs. 3%, 6 mg/mL Collagen vs. 3%, AHA vs. 3%, 0% vs. 3%  $****p \leq 0.0001$ ; 100-150: 2 mg/mL Collagen vs. 3%, 6 mg/mL Collagen vs. 3%  $*p = 0.0185$ ; AHA vs. 3%, 0% vs. 3%  $*p = 0.0386$ ; two-way ANOVA with Tukey post hoc (right). Data are mean  $\pm$  s.d. Source data provided as a source data file.

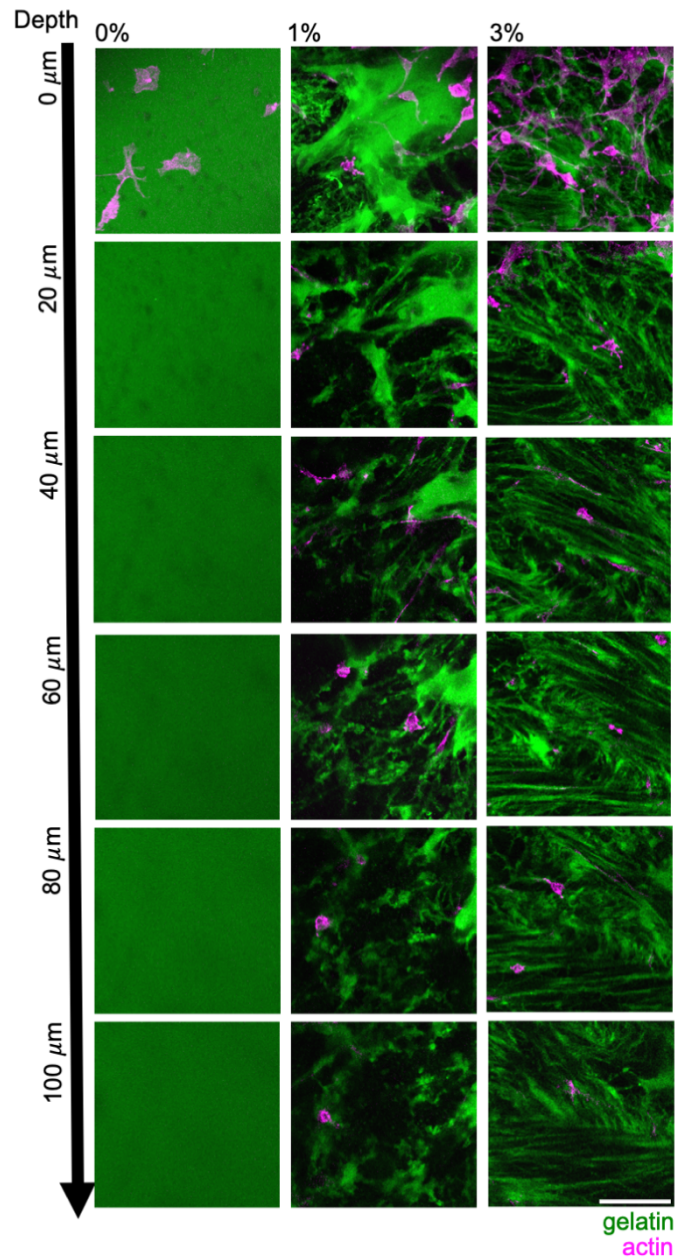

**Supplementary Fig. 17: Cell infiltration from meniscus explants is influenced by microinterfaces.** Single z-slices at different depths into the hydrogel (GR: green, GP: unlabeled) of ex vivo studies with single cell (magenta) infiltration. Scale Bar = 100 μm.

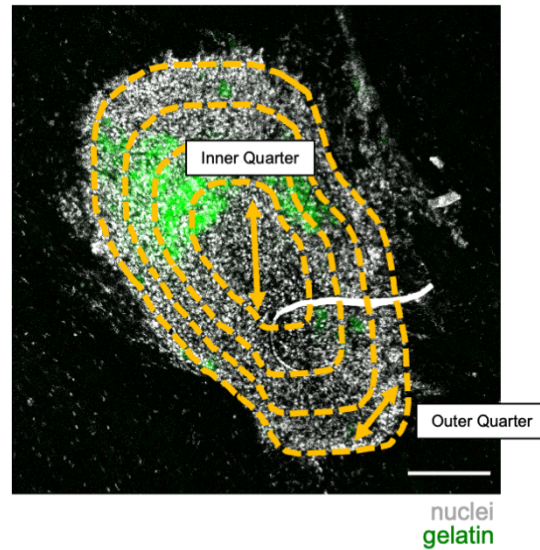

**Supplementary Fig. 18: Methodology for quantifying cell density within quartiles into in vivo defect space.** Representative in vivo maximum Z-projection of cells (nuclei: white, hydrogel: green) denoting binned areas for quantification (orange dashed line). Scale bar = 200  $\mu\text{m}$

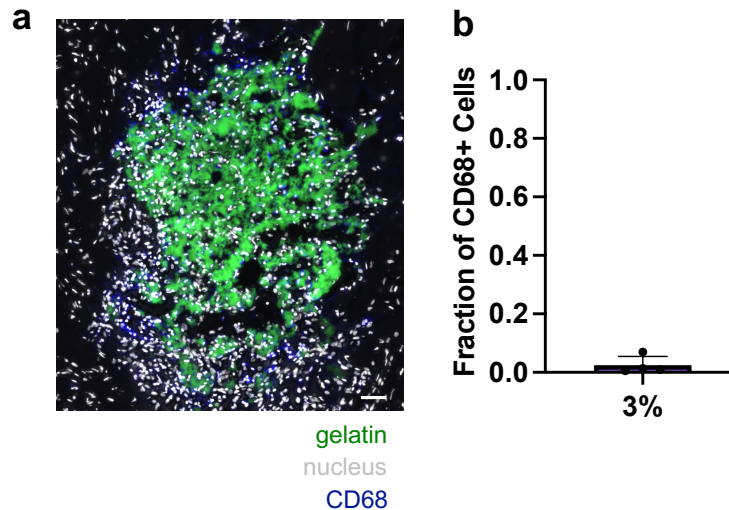

**Supplementary Fig. 19: Cell infiltration from non-meniscus cells in vivo is minimal.** **a**, Representative fluorescent image of remaining hydrogel (gelatin:green), CD68+ cells (blue) and cell nuclei (gray) and **b**, corresponding quantification of percentage of infiltrating cells that are CD68+ 14 days after implantation.  $n = 4$  explants from 3 rats. Scale Bar = 100  $\mu\text{m}$ . Source data for (b) provided as a source data file.

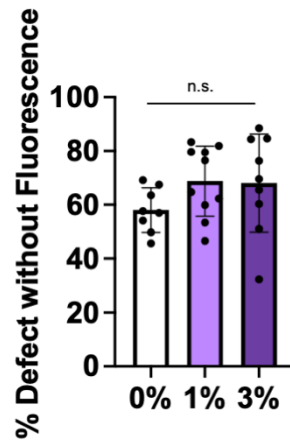

**Supplementary Fig. 20: Gelatin fluorescence within defects.** Quantification of fluorescence loss in vivo 14 days after subcutaneous implantation.  $n = 8$  (0%), 9 (3%) or 10 (1%) explants per condition across 8 rats. n.s. indicates no statistical significance, one-way ANOVA with Tukey post hoc. Data are mean  $\pm$  s.d. Source data provided as a source data file.

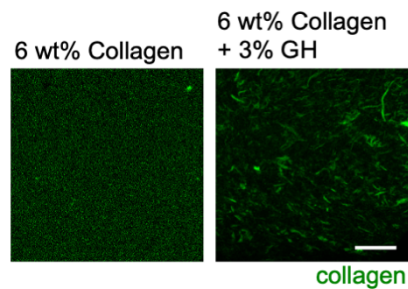

**Supplementary Fig. 21: Collagen-based hydrogels do not form bicontinuous hydrogels.** Representative single Z-sections of collagen hydrogels, with and without GH network. Scale bar = 50  $\mu\text{m}$ .

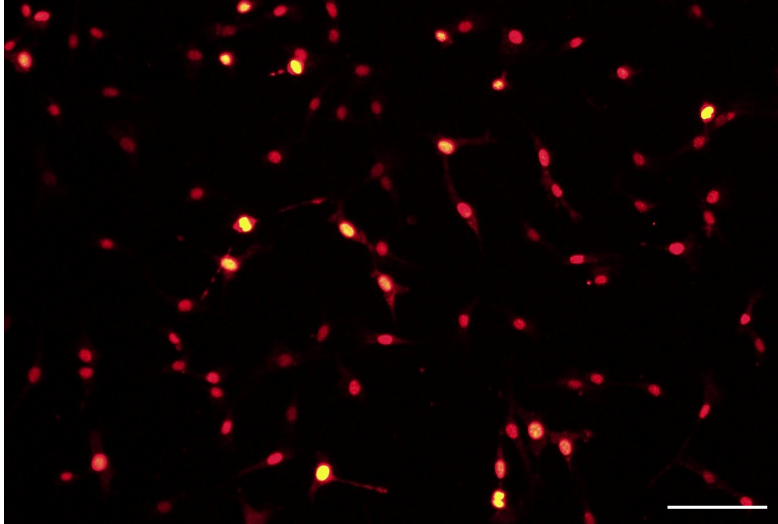

**Supplementary Fig. 22: Validation of Ki67 antibody.** Representative image of Ki67 (red). Scale Bar = 500  $\mu\text{m}$ .
